# Supplementary material for: Acetoxime coordinates to palladium(II) and is catalytically hydrolysed to acetone†
Source: Royal Society of Chemistry journal article supplement (doi:10.1039/b008753j), 2001-01-01
Supplement: b008753j.doc [file b008753j.doc]

Acetoxime coordinates to palladium(II) and is catalytically hydrolyzed to acetone

Natalia V. Kaminskaia and Nenad M. Kostić

Supporting information

Submitted to *Journal of Chemical Society, Dalton Transactions*

**Chart S1.** Palladium(II) and platinum(II) catalysts
